# Supplementary material
Source: PubMed Central journal article supplement (PMC2234111)
Supplement: pnas_0710982105_6.pdf [file pnas_0710982105_6.pdf]

# Table 2

| ZMW array             | Number of ZMWs | ZMWs with bottom side signal | ZMWs with top side signal | Colocalizations | Colocalizations expected by chance |
|-----------------------|----------------|------------------------------|---------------------------|-----------------|------------------------------------|
| 1                     | 4176           | 1210                         | 1123                      | 919             | 325                                |
| 2                     | 4806           | 1245                         | 1380                      | 852             | 357                                |
| 3                     | 4550           | 1636                         | 1412                      | 1084            | 508                                |
| 4                     | 4859           | 1625                         | 1369                      | 995             | 458                                |
| 5                     | 4335           | 962                          | 1163                      | 634             | 258                                |
| 6                     | 3524           | 856                          | 1084                      | 599             | 263                                |
| 7                     | 4028           | 1103                         | 1078                      | 664             | 295                                |
| 8                     | 4557           | 704                          | 723                       | 378             | 112                                |
| <b>sum</b>            |                |                              |                           | <b>6125</b>     | <b>2577</b>                        |
| <b>expected error</b> |                |                              |                           | <b>668</b>      | <b>349</b>                         |

ZMW colocalization analysis. Fluorescently labeled DNA synthesis products were images from the bottom and top side of ZMW arrays as described in Fig. 3. Observed colocalization occurrences are compared with values expected by chance, assuming random bottom- and top-side distributions.
