# Supplementary material
Source: PubMed Central journal article supplement (PMC2234111)

A

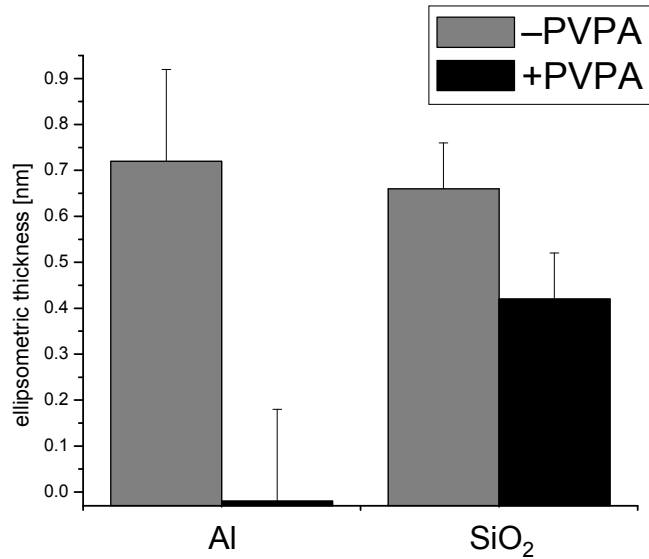

B

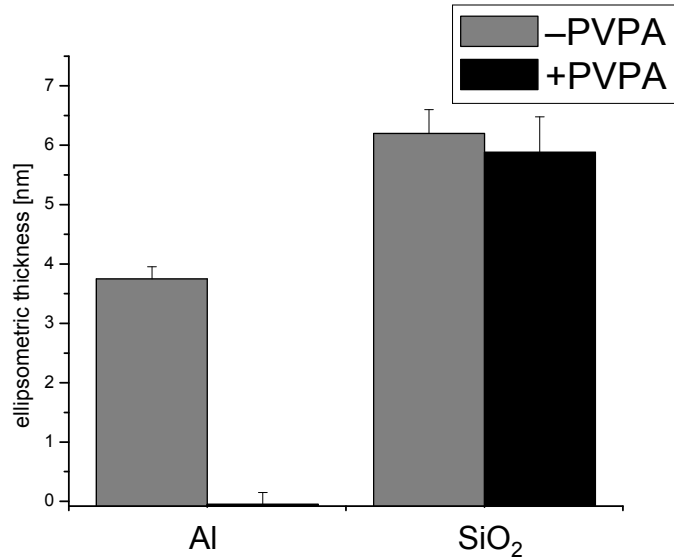

Supplement: pnas_0710982105_1.pdf [file pnas_0710982105_1.pdf]

-PVPA

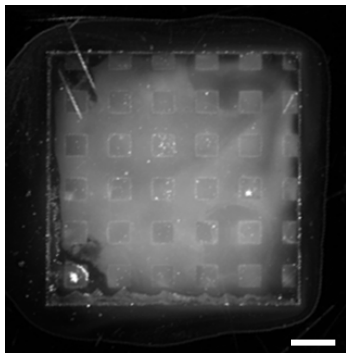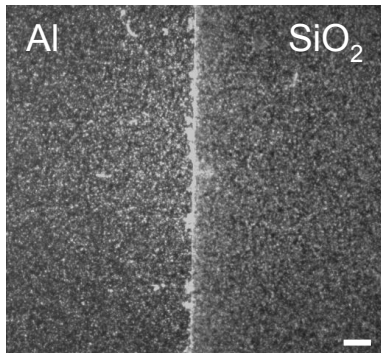

+PVPA

Al  
SiO<sub>2</sub>

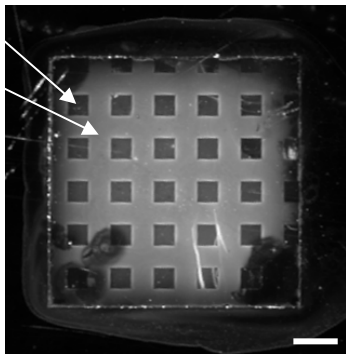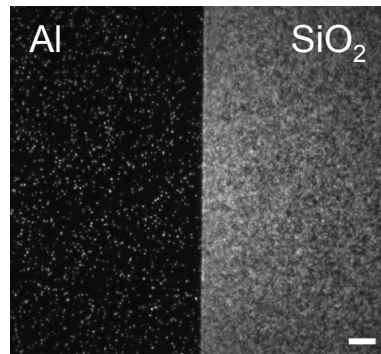

Supplement: pnas_0710982105_2.pdf [file pnas_0710982105_2.pdf]

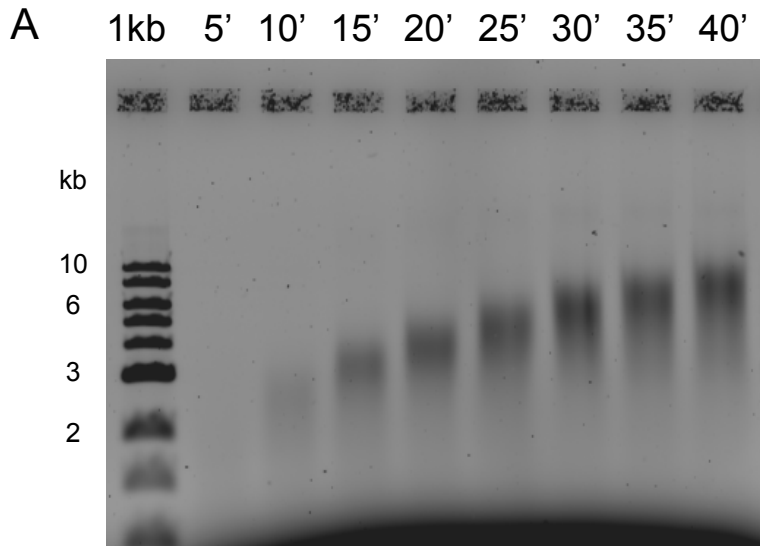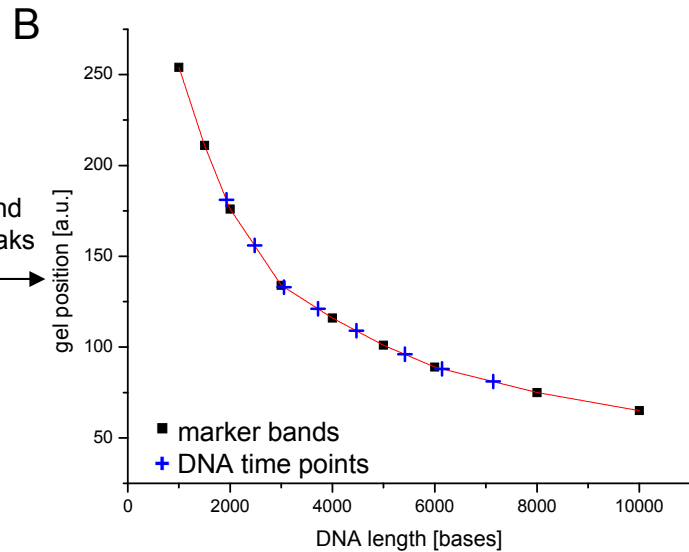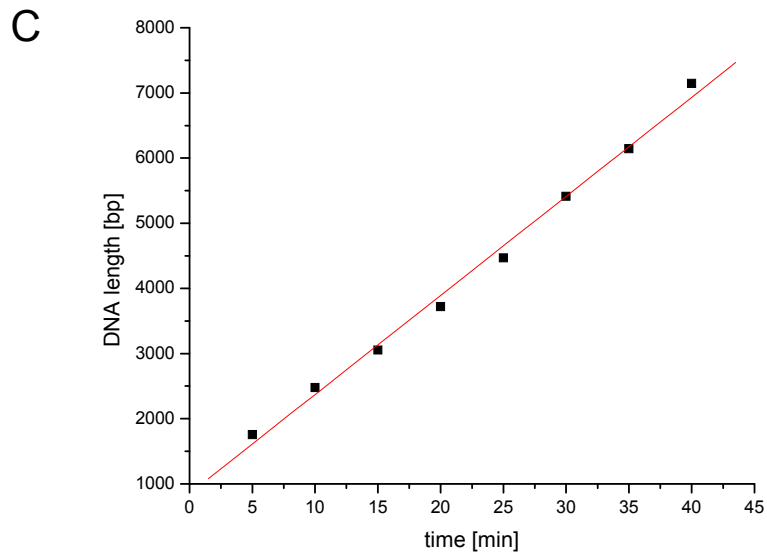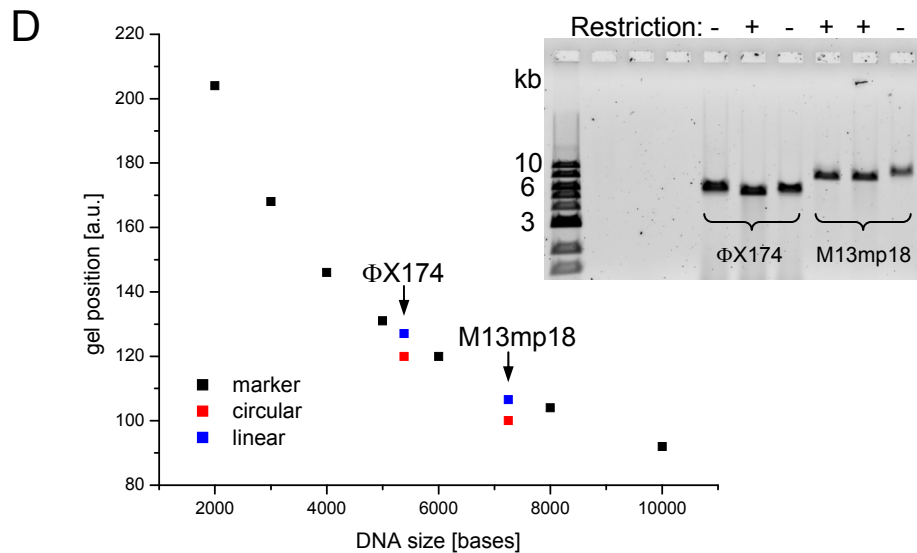

Supplement: pnas_0710982105_3.pdf [file pnas_0710982105_3.pdf]

A

5'

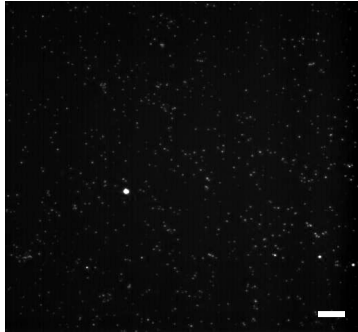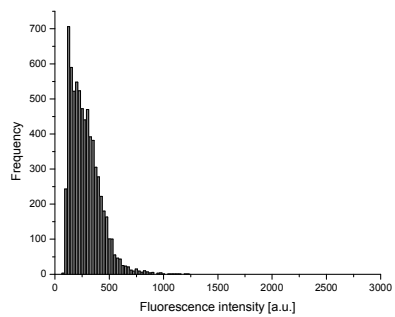

15'

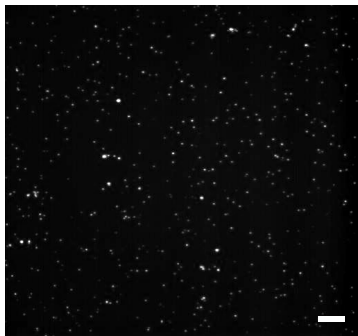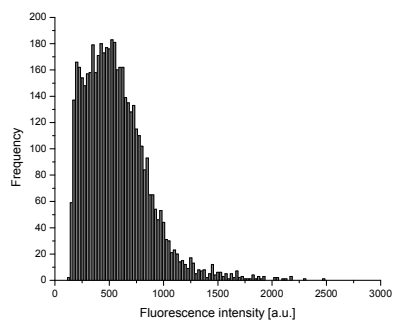

35'

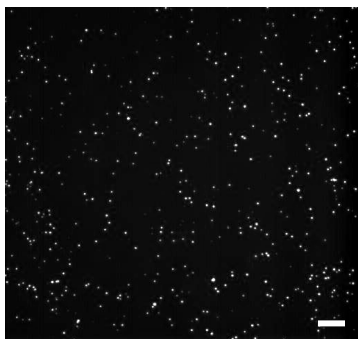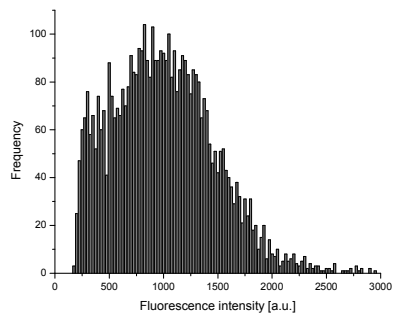

B

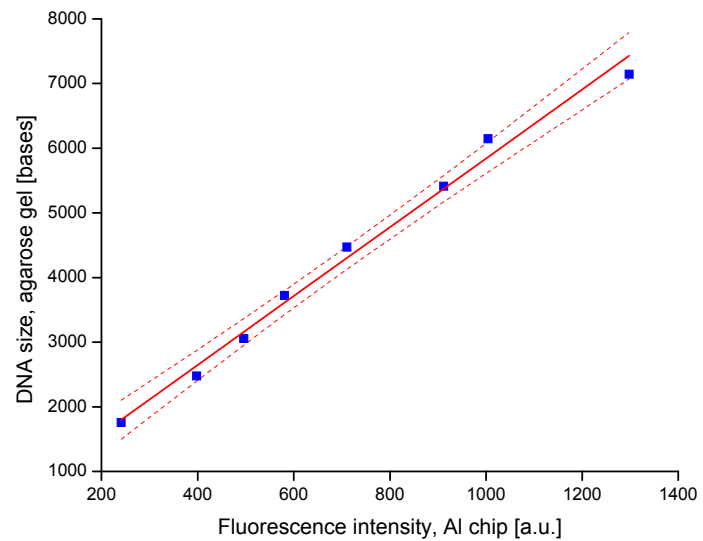

Supplement: pnas_0710982105_4.pdf [file pnas_0710982105_4.pdf]

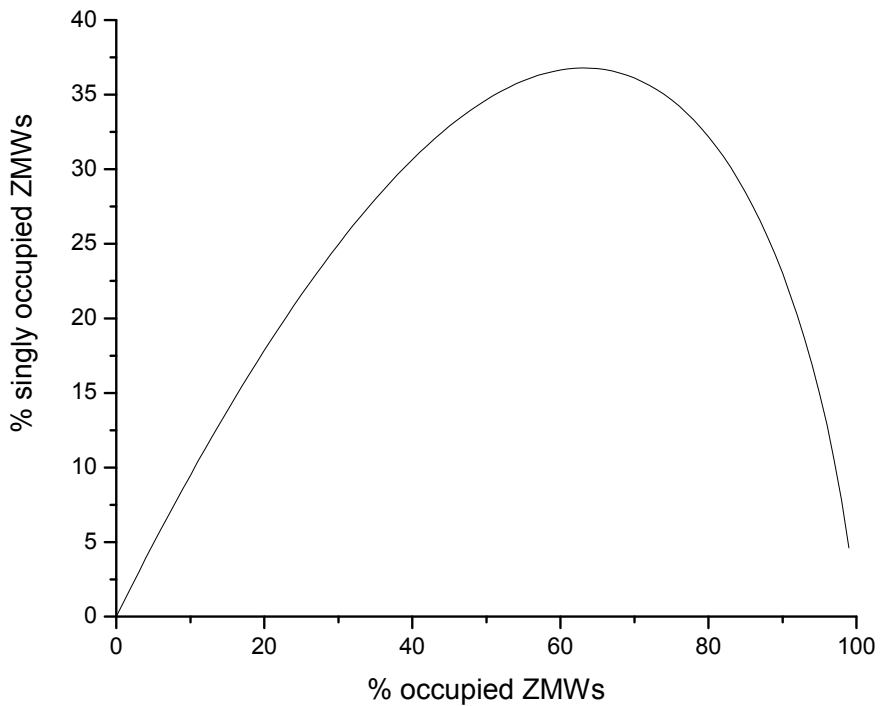

Supplement: pnas_0710982105_5.pdf [file pnas_0710982105_5.pdf]
